# Supplementary material
Source: publisher figshare collection journal article supplement (https://acs.figshare.com/ndownloader/files/26607165)
Supplement: Supplementary file 1 [file 26607165]

## Supporting Information

# **Mechanisms of Hydrogen Evolution Reaction in Two-Dimensional Nitride MXenes using In Situ X-Ray Absorption Spectroelectrochemistry**

Abdoulaye Djire<sup>1,2\*</sup>, Hanyu Zhang,<sup>1</sup> Benjamin J. Reinhart,<sup>3</sup> O. Charles Nwamba,<sup>1</sup> and Nathan R.  
Neale<sup>1\*</sup>

<sup>1</sup>Chemistry and Nanoscience Center, National Renewable Energy Laboratory, Golden, CO,  
80401, USA

<sup>2</sup> Artie McFerrin Department of Chemical Engineering, Texas A&M University, 3122 TAMU,  
College Station, TX 77843, USA

<sup>3</sup> Advanced Photon Source, Argonne National Laboratory, Argonne, Illinois 60439, USA

Corresponding Authors: [\\*adjire@tamu.edu](mailto:*adjire@tamu.edu), [\\*nathan.neale@nrel.gov](mailto:*nathan.neale@nrel.gov)

## Experimental Methods

### Materials Synthesis

The precursor  $\text{Ti}_4\text{AlN}_3$  MAX phase, exfoliated  $\text{Ti}_4\text{N}_3\text{T}_x$  MXene, and mixed-transition metal nitride  $\text{M-Ti}_4\text{N}_3\text{T}_x$  MXenes were synthesized according to the procedure used in our prior publication.<sup>1</sup>

### In-Situ X-Ray Absorption Spectroscopy

In-situ XAS measurements were performed in a custom-made in-situ electrochemical cell as shown in Figure S1. The working electrodes ( $\text{Ti}_4\text{AlN}_3$  MAX, pristine  $\text{Ti}_4\text{N}_3\text{T}_x$  MXene, and  $\text{M-Ti}_4\text{N}_3\text{T}_x$  MXenes) were prepared by membrane filtration process using an ITO substrate.<sup>1-3</sup> The reference and counter electrodes were Ag/AgCl and graphite rod, respectively. XAS measurements were performed in 0.5 M  $\text{H}_2\text{SO}_4$  electrolytic solution. The electrolyte solution was purged with  $\text{N}_2$  (99.998%) for half an hour prior to adding into the in-situ electrochemical reaction cell. XAS measurements were performed in fluorescence mode at the multi-purpose beamline for spectroscopy, 12-BM at APS. A defined beam size of  $0.5 \times 0.8 \text{ mm}^2$  using slits and an incident photon flux of  $\sim 10^{11} \text{ photons s}^{-1}$  were used. For each material, first, we collected XAS spectra on the dried and wet forms (at the open circuit potential) using a Biologic potentiostat SP300. Prior to the potential-hold XAS measurements, cyclic voltammograms and linear sweep voltammograms were acquired for each sample to ensure that the electrochemical features were consistent with previous work.<sup>1</sup> Next, we collected spectra at four (4) different potentials within the voltage window. After that, we measured XAS at  $-0.5 \text{ V}$  vs. Ag/AgCl, which is in the HER activity region for some but not all of the samples. During each measurement, the nitride MXene material in the in-situ electrochemical cell was held at a constant potential for 15 min prior to the XAS measurements and held at this potential during the XAS data acquisition. Each spectrum

shown in Figure S2a-d is the average of three (3) scans or spectra. Additionally, we collected XAS spectra for bare metal foils as references as shown in Figure S2a-d.

### In-situ X-Ray Absorption Spectroelectrochemical Cell

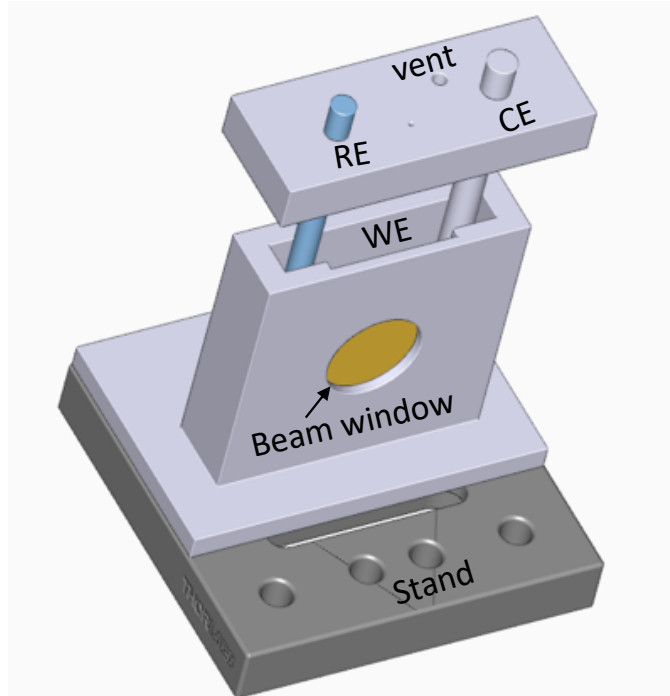

**Figure S1.** In-situ electrochemical cell for the x-ray absorption spectroelectrochemical experiments. RE and CE are the reference electrode (Ag/AgCl, 6 mm) and counter electrode (graphite rod, 7.5 cm long and 6 mm in diameter), respectively. The working electrode (WE) was comprised of exfoliated  $\text{Ti}_4\text{N}_3\text{T}_x$  and M- $\text{Ti}_4\text{N}_3\text{T}_x$  MXenes. Thin coated nitride MXenes on ITO working electrodes ( $\sim 100$  nm thick) were mounted near the window of the in-situ cell. The window was covered with Kapton tape. We observed no scattering from the electrolyte during the XAS measurements.

### **In-situ X-Ray Absorption Spectroelectrochemical Characterization**

We used in-situ x-ray absorption spectroscopy (XAS) technique to elucidate the mechanisms of hydrogen evolution reaction (HER) activity in two-dimensional (2D) nitride MXenes. Figure S2 shows the normalized fluorescence XAS spectra for the  $\text{Ti}_4\text{AlN}_3$  MAX phase, exfoliated  $\text{Ti}_4\text{N}_3\text{T}_x$  MXene, and mixed-metal  $\text{Mn-Ti}_4\text{N}_3\text{T}_x$ ,  $\text{Mo-Ti}_4\text{N}_3\text{T}_x$ , and  $\text{Cr-Ti}_4\text{N}_3\text{T}_x$  nitride MXenes. Each spectrum shown in Figure S2a-d is the average of three (3) scans or spectra. Additionally, we collect XAS spectra for bare metal foils as references as shown in Figure S2a-d. The spectra in Figure S2a-d show the absorption k-edge energies for Ti, Mn, Mo, and Cr metals and are normalized to the initial absorption energy,  $E_0$ . The k-edge absorption energy  $\mu(E)$  shown here for the Ti, Mn, Mo, and Cr metals are directly proportional to the ratio of the fluorescence intensity leaving the material,  $I_f$ , and the initial intensity going into the material,  $I_0$ , according to the following equation: <sup>4</sup>

$$\mu(E) \propto I_f/I_0 \quad (1)$$

The intensity of the  $I_0$  was measured by using an ion chamber. The XAS spectra in Figure S2a-d are comprised of the x-ray absorption near-edge structure (XANES) and the extended x-ray absorption fine structure (EXAFS) and contain information on the changes in the electronical and structural properties in the nitride MXenes during electrochemical performance and catalytic HER activity. <sup>4</sup>

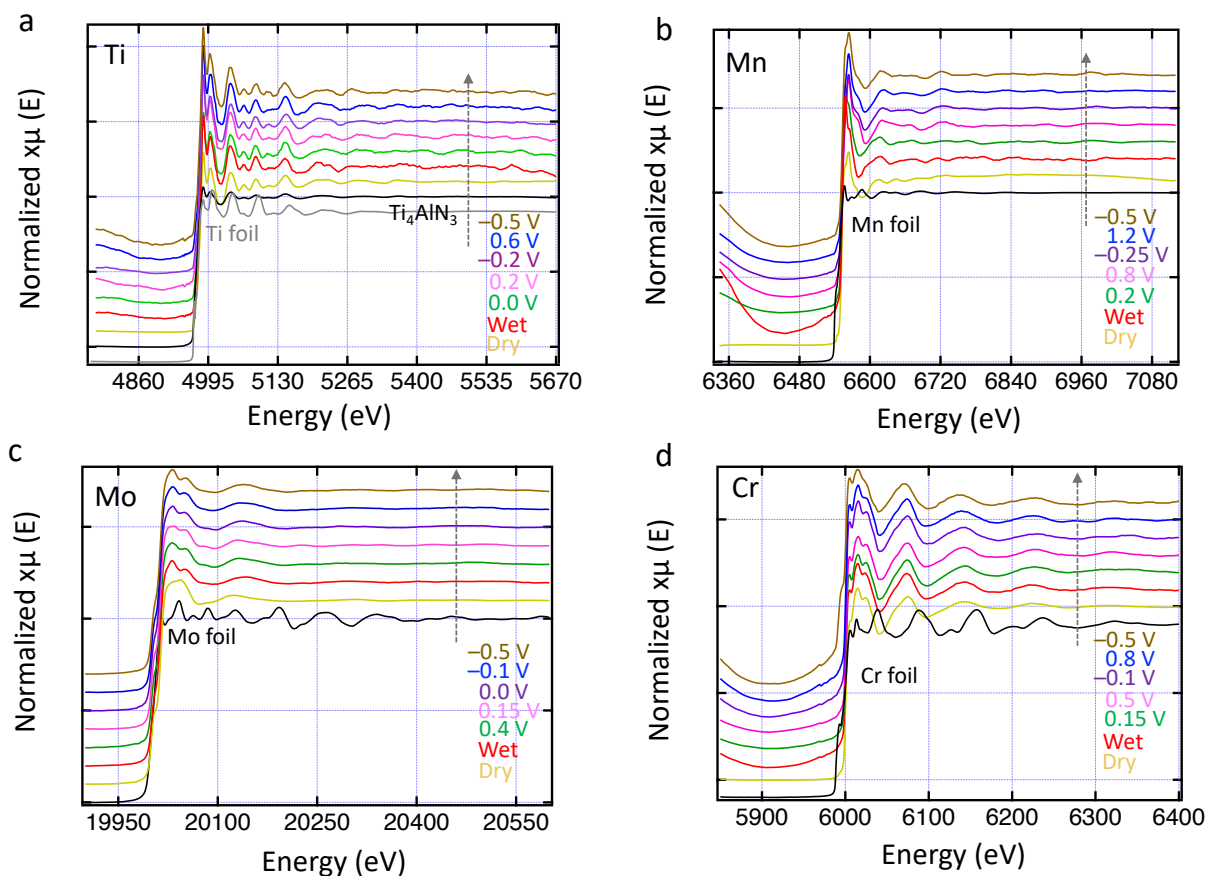

**Figure S2.** Normalized x-ray absorption spectroscopy (XAS) data for (a) pristine  $\text{Ti}_4\text{N}_3\text{T}_x$ , (b) Mn- $\text{Ti}_4\text{N}_3\text{T}_x$ , (c) Mo- $\text{Ti}_4\text{N}_3\text{T}_x$ , and (d) Cr- $\text{Ti}_4\text{N}_3\text{T}_x$  MXenes, showing the Ti, Mn, Mo, and Cr k edge energy, respectively. First, we collected XAS spectra for dry and wet samples, then, under operating conditions at different potentials in 0.5 M  $\text{H}_2\text{SO}_4$  electrolytic solution. For the spectra collected under operating conditions, the pristine  $\text{Ti}_4\text{N}_3\text{T}_x$  MXene and M- $\text{Ti}_4\text{N}_3\text{T}_x$  MXenes were held at a constant potential for 15 min before the XAS measurement and held at the set potential while we collected the XAS spectra. The XAS spectrum for the precursor  $\text{Ti}_4\text{AlN}_3$  MAX phase is also shown (black spectrum in (a)). Additionally, we collected XAS spectra for bare metal foils as references as shown in (a-d). For all the materials, the spectrum (brown color) for the potential hold experiment at -0.5 V versus Ag/AgCl (V) is used to probe the HER XAS. We used Ag/AgCl and graphite rod as reference and counter electrodes, respectively.

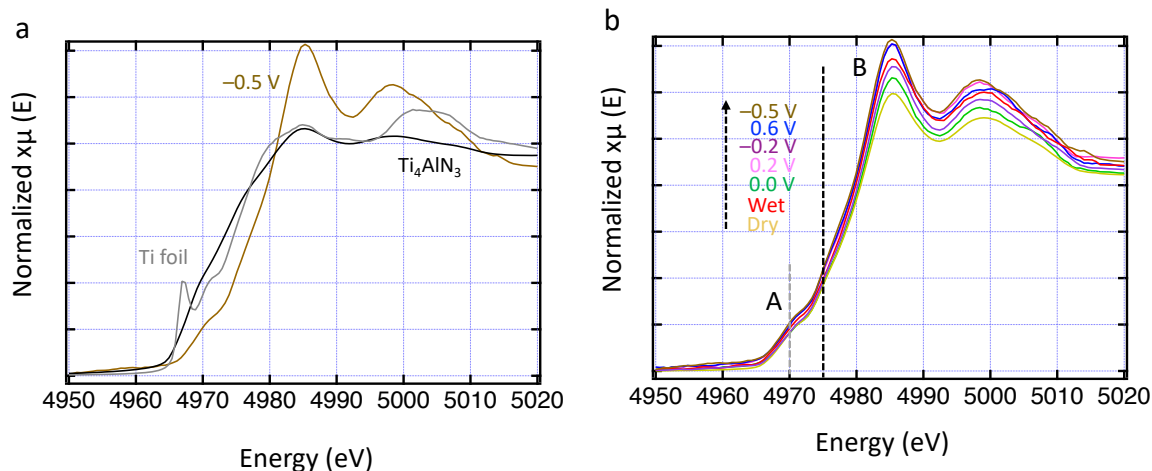

**Figure S3.** Normalized x-ray absorption near edge structure (XANES) for overlaid normalized XANES spectra for (a)  $\text{Ti}_4\text{AlN}_3$  MAX phase (grey), dry (gold spectrum), and  $-0.5$  V vs. RHE (V) (brown), and for (b) different potentials in  $0.5$  M  $\text{H}_2\text{SO}_4$  electrolyte for pristine  $\text{Ti}_4\text{N}_3\text{T}_x$ . The grey and black dashed lines denote the pre-edge and edge energies, respectively. We used Ag/AgCl and graphite rod as reference and counter electrodes, respectively.

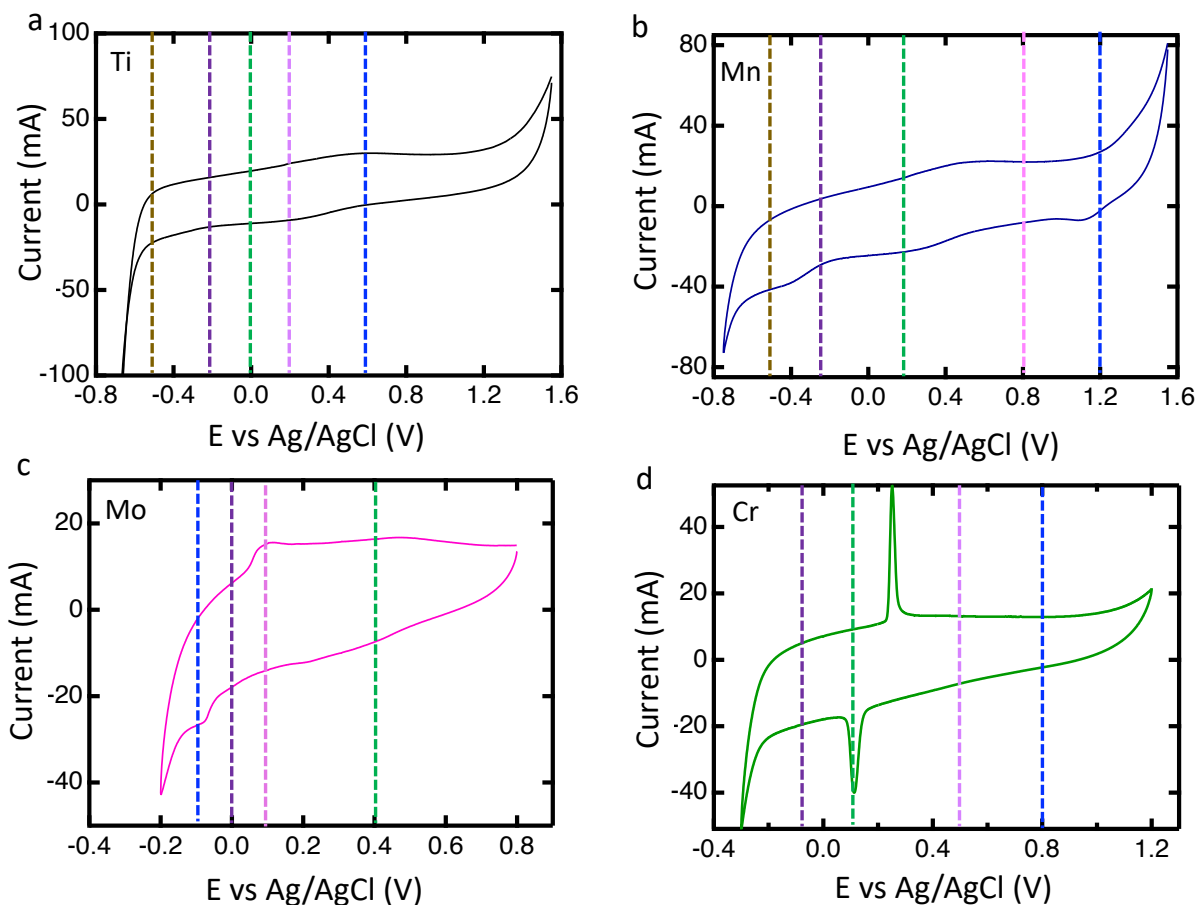

**Figure S4.** Cyclic voltammograms for (a)  $\text{Ti}_4\text{N}_3\text{T}_x$  (black), (b)  $\text{Mn-Ti}_4\text{N}_3\text{T}_x$  (blue), (c)  $\text{Mo-Ti}_4\text{N}_3\text{T}_x$  (pink), and (d)  $\text{Cr-Ti}_4\text{N}_3\text{T}_x$  (green) in 0.5 M  $\text{H}_2\text{SO}_4$  electrolyte at  $50 \text{ mV s}^{-1}$  adapted from reference.

<sup>1</sup> The in-situ XAS measurements were taken at the dashed lines shown in the voltammograms. The brown dashed line at  $-0.5 \text{ V}$  in panels a and b used for the HER XAS measurement is outside of the voltage window for Cr- and Mo- $\text{Ti}_4\text{N}_3\text{T}_x$  MXenes (panels c and d).

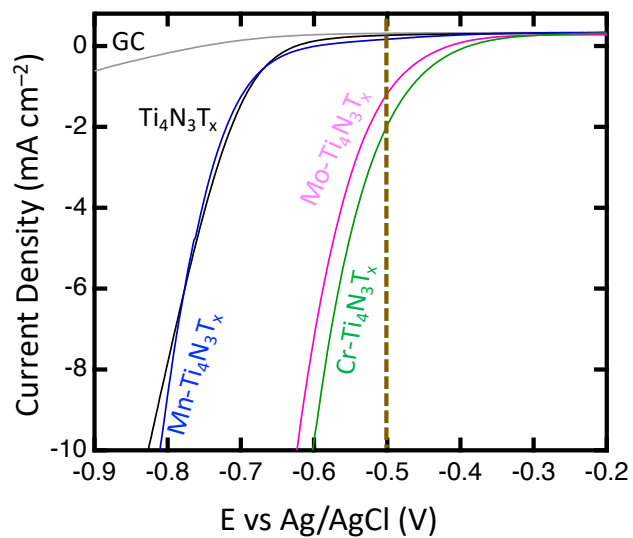

**Figure S5.** Linear sweep voltammetry for bare glassy carbon (grey), exfoliated  $\text{Ti}_4\text{N}_3\text{T}_x$  MXene (black),  $\text{Mn-Ti}_4\text{N}_3\text{T}_x$  (blue),  $\text{Mo-Ti}_4\text{N}_3\text{T}_x$  (pink), and  $\text{Cr-Ti}_4\text{N}_3\text{T}_x$  (green) in 0.5 M  $\text{H}_2\text{SO}_4$  electrolyte solution at  $5 \text{ mV s}^{-1}$  adapted from reference.<sup>1</sup> The brown dashed line indicates the potential used for the in-situ XAS measurement taken at the HER region for the  $\text{Mo-Ti}_4\text{N}_3\text{T}_x$  and  $\text{Cr-Ti}_4\text{N}_3\text{T}_x$  samples.



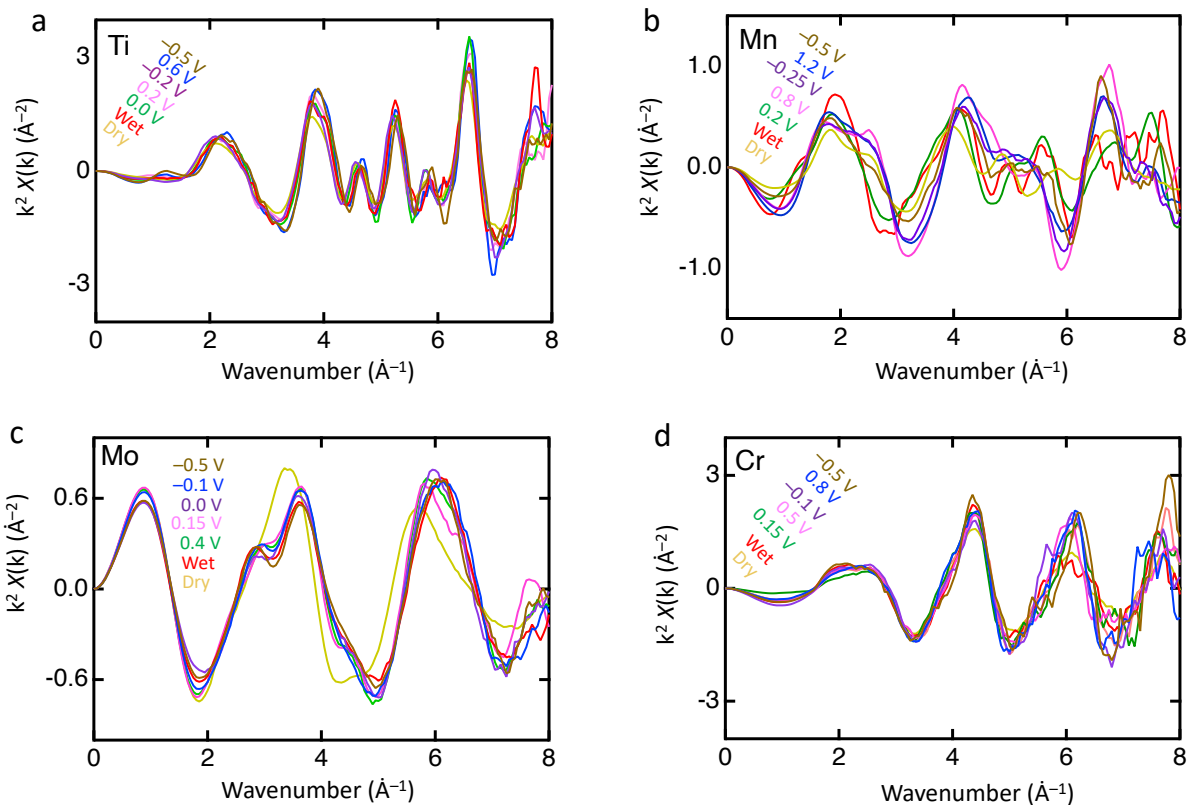

**Figure S6.** K-space spectra for dry (gold spectrum), wet (red spectrum) and different potentials in 0.5 M  $\text{H}_2\text{SO}_4$  electrolyte for (a) pristine  $\text{Ti}_4\text{N}_3\text{T}_x$ , (b)  $\text{Mn-Ti}_4\text{N}_3\text{T}_x$ , (c)  $\text{Mo-Ti}_4\text{N}_3\text{T}_x$ , and (d)  $\text{Cr-Ti}_4\text{N}_3\text{T}_x$  MXenes. We used Ag/AgCl and graphite rod as reference and counter electrodes, respectively. We used a K weight of 2.

### In-situ Extended X-Ray Absorption Fine Structure

The EXAFS spectra for the pristine exfoliated Ti<sub>4</sub>N<sub>3</sub>T<sub>x</sub> nitride MXene were fitted to the EXAFS equation using FEFF and IFEFFIT in Artemis software. <sup>4</sup>

$$\chi(k) = S_0^2 \sum_i N_i \frac{|f_i(k)|}{kR_i^2} e^{(-2\sigma_i^2 k^2)} e^{(-2R_i/\lambda(k))} \sin(2kR_i + 2\delta_i + \varphi_i) \quad (2)$$

Where  $S_0^2$  is the amplitude reduction factor,  $N_i$  is the number of scattering atoms,  $f_i(k)$  is the scattering amplitude,  $R_i$  is the distance from the central atom to the scattering atom, the exponent terms account for the disorder in the position of the atoms and scattered photoelectron vertically over a short distance,  $\delta_i$  is the phase shift undergone by the photoelectron at the central atom, and  $\varphi_i$  is the phase shift undergone by the photoelectron when it bounces off the scattering atom. <sup>4</sup>

**Table S1.** Fitting parameters from the IFEFF simulation from Artemis software for the pristine exfoliated Ti<sub>4</sub>N<sub>3</sub>T<sub>x</sub> MXene at different conditions, R-factor < 0.03.

| Electrode | Scattering path &<br>N | Amplitude<br>$S_0^2$ | Bond strength<br>( $\sigma^2$ ) | Distance from Ti R<br>(Å) |
|-----------|------------------------|----------------------|---------------------------------|---------------------------|
| Dry       | Ti–N (3)               | 0.703                | 0.00182                         | 2.06922                   |
|           | Ti–Ti (6)              | 0.703                | 0.00191                         | 2.99781                   |
|           | Ti–N–Ti–N (3)          | 0.703                | 0.00514                         | 4.14660                   |
| Wet       | Ti–N (3)               | 0.955                | 0.00397                         | 2.10830                   |
|           | Ti–Ti (6)              | 0.955                | 0.00141                         | 3.03220                   |
|           | Ti–N (6)               | 0.955                | 0.00512                         | 3.77450                   |

| Electrode | Scattering path &<br>N | Amplitude<br>$S_o^2$ | Bond strength<br>( $\sigma^2$ ) | Distance from Ti R<br>(Å) |
|-----------|------------------------|----------------------|---------------------------------|---------------------------|
| 0 V       | Ti–N (3)               | 0.832                | 0.00184                         | 2.05137                   |
|           | Ti–Ti (6)              | 0.832                | 0.00153                         | 2.99025                   |
|           | Ti–N–Ti–N (3)          | 0.832                | 0.00573                         | 4.10119                   |
| 0.2 V     | Ti–N (3)               | 0.926                | 0.00004                         | 2.06073                   |
|           | Ti–Ti (6)              | 0.926                | 0.00255                         | 2.99493                   |
|           | Ti–N–Ti–N (3)          | 0.926                | 0.00390                         | 4.10213                   |
| –0.2 V    | Ti–N (3)               | 0.752                | 0.00107                         | 2.05940                   |
|           | Ti–Ti (6)              | 0.752                | 0.00045                         | 2.98465                   |
|           | Ti–N–Ti–N (3)          | 0.752                | 0.00321                         | 4.07087                   |
| 0.6 V     | Ti–N (3)               | 0.917                | 0.00123                         | 2.07266                   |
|           | Ti–Ti (6)              | 0.917                | 0.00091                         | 3.00772                   |
|           | Ti–N–Ti–N (3)          | 0.917                | 0.00389                         | 4.10476                   |
| –0.5 V    | Ti–N (3)               | 1.074                | 0.00432                         | 2.07050                   |
|           | Ti–Ti (6)              | 1.074                | 0.00487                         | 2.99852                   |
|           | Ti–N–Ti–N (3)          | 1.074                | 0.00553                         | 4.10117                   |

## References

- (1) Djire, A.; Wang, X.; Xiao, C.; Nwamba, O. C.; Mirkin, M. V.; Neale, N. R. Basal Plane Hydrogen Evolution Activity from Mixed Metal Nitride MXenes Measured by Scanning Electrochemical Microscopy. *Adv. Funct. Mater.* **2020**, *116*, 2001136.
- (2) Djire, A.; Bos, A.; Liu, J.; Zhang, H.; Miller, E. M.; Neale, N. R. Pseudocapacitive Storage in Nanolayered  $\text{Ti}_2\text{NT}_x$  MXene Using Mg-Ion Electrolyte. *ACS Appl. Nano Mater.* **2019**, *2*, 2785–2795.
- (3) Djire, A.; Zhang, H.; Liu, J.; Miller, E. M.; Neale, N. R. Electrocatalytic and Optoelectronic Characteristics of the Two-Dimensional Titanium Nitride  $\text{Ti}_4\text{N}_3\text{T}_x$  MXene. *ACS Appl. Mater. Interfaces* **2019**, *11*, 11812–11823.
- (4) Ravel, B.; Newville, M.; IUCr. ATHENA, ARTEMIS, HEPHAESTUS: Data Analysis for X-Ray Absorption Spectroscopy Using IFEFFIT. *J. Synchrotron Rad.* **2005**, *12*, 537–541.
